# Supplementary material
Source: Springer Nature journal article supplement (https://www.springermedizin.de/resource/supplementary/13098_2011_171_MOESM6_ESM.pdf/9670626)

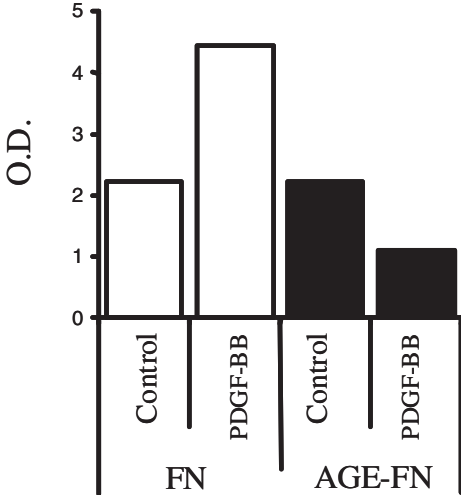

IGFBP-4 →

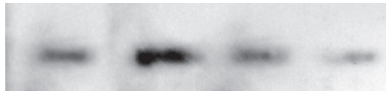

Supplement: MOESM6 [file 9670626]
